# Supplementary material for: The Effects of Marine Algal Polyphenols, Phlorotannins, on Skeletal Muscle Growth in C2C12 Muscle Cells via Smad and IGF-1 Signaling Pathways
Source: MDPI journal article supplement (doi:10.3390/md19050266), 2021-05-10

Figure S1. The high-performance liquid chromatography (HPLC) chromatogram of ethyl acetate (EtOAc) fraction from 70% (v/v) aqueous ethanol extract of *E. cava*.

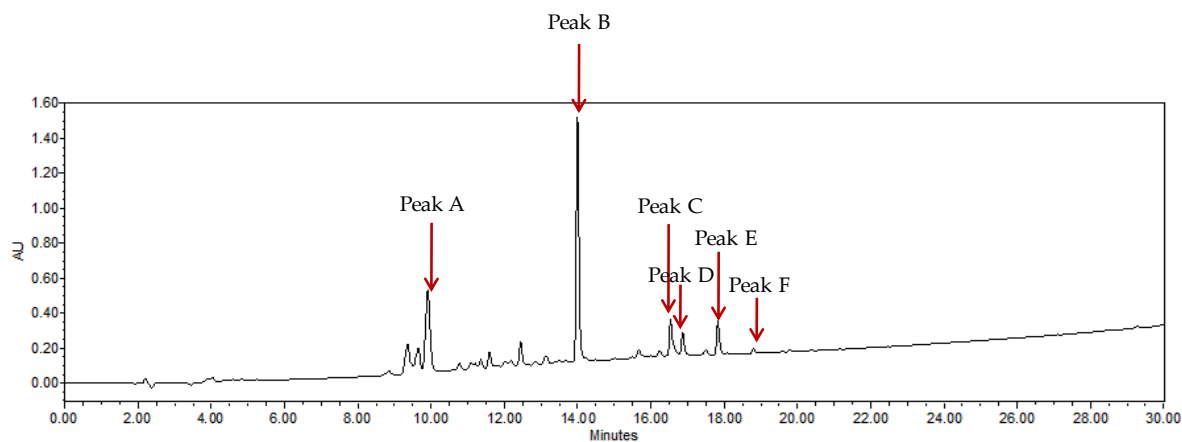

Figure S2. The mass spectral data were analyzed on electro spray ionization (ESI) interface mode of six peaks obtained from LC/MS.

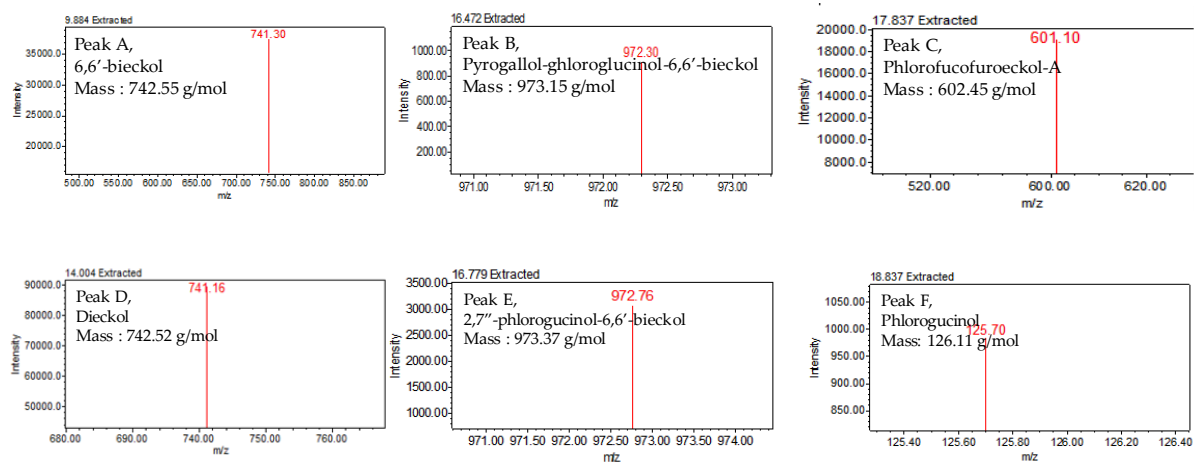

Supplement: s1 [file s1]
